# Supplementary material
Source: publisher site journal article supplement (https://www.dovepress.com/get_supplementary_file.php?f=378135.docx)
Supplement: Supplementary file 1 [file get_supplementary_file.php]

| **Supplementary table 1. List of investigational sites and related ethics committees** | |
| --- | --- |
| **List of investigational sites and related ethics committees** | |
| **Center 1 (1001) 108168/2**  Dr. Severino PERSECHINO  U.O.C. Dermatologia Università La Sapienza  Azienda Ospedaliera Sant'Andrea VIA DI GROTTAROSSA, 1035/1039 00189 ROMA (RM) | **Ethics Committee**  COMITATO ETICO DELL'UNIVERSITA' SAPIENZA VIALE DEL POLICLINICO, 155  00161 ROMA (RM) |
| **Center 2 (1002) 108794/2**  Dr.ssa Monica PAU Clinica Dermatologica Università degli Studi  Ospedale S. Giovanni di Dio  Azienda Ospedaliero-Universitaria di Cagliari VIA OSPEDALE, 54  09124 CAGLIARI (CA) | **Ethics Committee**  COMITATO ETICO INDIPENDENTE DELL'AZIENDA OSPEDALIERA UNIVERSITARIA DI CAGLIARI  VIA OSPEDALE, 54  09124 CAGLIARI (CA) |
| **Center 3 (1003) 118077/3**  Dr. Francesco CUSANO  U.O.C. di Dermatologia  Azienda Ospedaliera G. Rummo Via dell'Angelo, 1  82100 BENEVENTO (BN) | **Ethics Committee**  COMITATO ETICO CAMPANIA NORD c/o AZIENDA OSPEDALIERA 'S. GIUSEPPE MOSCATI' DI AVELLINO  CONTRADA AMORETTA-CITTA' OSPEDALIERA 83100 AVELLINO (AV) |
| **Center 4 (1004) 115265/21**  Dr.ssa Maria Laura FLORI  U.O.S. Allergologia Dermatologica - U.O.C. Dermatologia - D.A.I. Medicina Int. e Specialist. Università degli Studi di Siena  Azienda Ospedaliera Universitaria Senese Ospedale Santa Maria alle Scotte Viale Bracci, 1/16  53100 SIENA (SI) | **Ethics Committee**  COMITATO ETICO REGIONE TOSCANA - AREA VASTA SUD EST presso AZIENDA OSPEDALIERA UNIVERSITARIA SENESE DI SIENA  c/o UOC Farmacia AOUS - Viale Bracci 53100 SIENA (SI) |
| **Center 5 (1005) 117142/15**  Dr. Giuseppe STINCO  S.O.C. Clinica di Dermatologia | **Ethics Committee**  Comitato Etico Unico Regionale (CEUR) c/o Direzione Scientifica del Centro di riferimento Oncologico di Aviano |

|  | |
| --- | --- |
| Università degli Studi  Presidio Ospedaliero Santa Maria della Misericordia di Udine Azienda Sanitaria Universitaria Integrata di Udine  P.le S.M.della Misericordia, 15 33100 UDINE (UD) | Via Gallini 2  33081 AVIANO (PN) |
| **Center 6 (1006) 205457/2**  Dr. Carlo MAZZATENTA  U.O. Dermatologia Ospedale San Luca AZIENDA USL 2 LUCCA  Via Guglielmo Lippi Francesconi 55100 LUCCA (LU) | **Ethics Committee**  COMITATO REGIONE TOSCANA - AREA VASTA NORD OVEST c/o AZIENDA OSPEDALIERO UNIVERSITARIA PISANA DI PISA  VIA ROMA, 67  56126 PISA (PI) |
| **Center 7 (1007) 138350/3**  Prof. Giampiero GIROLOMONI  U.O. Clinica Dermatologica Università degli Studi di Verona Ospedale Borgo Trento  AZ. OSPEDALIERA UNIVERSITARIA INTEGRATA VERONA PIAZZALE ARISTIDE STEFANI, 1  37126 VERONA (VR) | **Ethics Committee**  COMITATO ETICO PER LA SPERIMENTAZIONE CLINICA DELLE PROVINCE DI VERONA E ROVIGO PRESSO AOUI VERONA  PIAZZALE LUDOVICO ANTONIO SCURO, 10 37134 VERONA (VR) |
| **Center 8 (1008) 138867/2**  Dr. Leonardo ZICHICHI  U.O.C. Dermatologia  Presidio Ospedaliero S. Antonio Abate ASP TRAPANI  Via Cosenza, 82 - Loc. Casa Santa 91016 ERICE (TP) | **Ethics Committee**  COMITATO ETICO PALERMO 2 c/o AZIENDA OSPEDALIERA OSPEDALI RIUNITI VILLA SOFIA - CERVELLO  VIA TRABUCCO, 180  90146 PALERMO (PA) |
| **Center 9 (1009) 116124/15**  Dr.ssa Valeria BRAZZELLI  S.C. Dermatologia  Fondazione IRCCS Policlinico S. Matteo Viale Golgi, 19  27100 PAVIA (PV) | **Ethics Committee**  COMITATO ETICO DI PAVIA c/o FONDAZIONE IRCCS POLICLINICO SAN MATTEO DI PAVIA  VIALE GOLGI 19  27100 PAVIA (PV) |
| **Center 10 (1010) 110024/9**  Prof.ssa Maria Concetta FARGNOLI  U.O.S.D. Dermatologia Generale e Oncologica Università degli Studi L'Aquila | **Ethics Committee**  COMITATO ETICO PER LE PROVINCE DI L'AQUILA E TERAMO PRESIDIO OSPEDALIERO L'AQUILA, LOC.VETOIO, COPPITO 67100 L'AQUILA (AQ) |

|  | |
| --- | --- |
| Presidio Ospedaliero S. Salvatore ASL 1 Avezzano Sulmona L'Aquila Via Vetoio, 1 - Località Coppito 67100 L'AQUILA (AQ) |  |
| **Center 11 (1011) 127282/5**  Prof. Paolo AMERIO Centro di Ricerca Clinica Università G. D'Annunzio  Centro Studi sull'Invecchiamento - Ce.S.I. FONDAZIONE UNIVERSITÀ GABRIELE D'ANNUNZIO  Via Luigi Polacchi, 11/13 66100 CHIETI (CH) | **Ethics Committee**  COMITATO ETICO PER LE PROVINCE DI CHIETI E PESCARA VIA DEI VESTINI, 29B  66100 CHIETI SCALO (CH) |
| **Center 12 (1012) 102939/5**  Prof. Raffaele FILOTICO  U.O.C. di Dermatologia  Presidio Ospedaliero Antonio Perrino ASL BRINDISI  Strada Statale 7 per Mesagne 72100 BRINDISI (BR) | **Ethics Committee**  COMITATO INDIPENDENTE DI ETICA MEDICA DELLA AUSL BR DI BRINDISI  VIA NAPOLI, 8  72100 BRINDISI (BR) |
| **Center 13 (1013) 130978/5**  Dr. Stefano PIASERICO Clinica Dermatologica  Azienda Ospedaliera di Padova VIA VINCENZO GALLUCCI, 4 35121 PADOVA (PD) | **Ethics Committee**  COMITATO ETICO PER LA SPERIMENTAZIONE CLINICA DELLA PROVINCIA DI PADOVA PRESSO AOU PADOVA  VIA NICOLO' GIUSTINIANI, 2 35128 PADOVA (PD) |
| **Center 14 (1014) 116960/4**  Dr.ssa Chiara FRANCHI Servizio di Dermatologia  IRCCS Istituto Ortopedico Galeazzi VIA RICCARDO GALEAZZI, 4 20100 MILANO (MI) | **Ethics Committee**  COMITATO ETICO DELL'IRCCS OSPEDALE SAN RAFFAELE DI MILANO VIA OLGETTINA, 60  20132 MILANO (MI) |
| **Center 15 (1015) 117134/10**  Prof. Piergiacomo CALZAVARA PINTON  U.O. Dermatologia Dipartimento di Medicina  P.O. Spedali Civili di Brescia  ASST degli Spedali Civili di Brescia PIAZZALE SPEDALI CIVILI, 1 | **Ethics Committee**  COMITATO ETICO DELLA PROVINCIA DI BRESCIA c/o AO Spedali Civili PIAZZALE SPEDALI CIVILI, 1  25123 BRESCIA (BS) |

|  | |
| --- | --- |
| 25123 BRESCIA (BS) |  |
| **Center 16 (1016) 117179/19**  Dr. Angelo CATTANEO  U.O. Dermatologia Università degli Studi  Fond. IRCCS Ca' Granda Ospedale Maggiore Policlinico VIA PACE, 9  20122 MILANO (MI) | **Ethics Committee**  COMITATO ETICO MILANO AREA 2 c/o FONDAZIONE IRCCS CA' GRANDA OSPEDALE MAGGIORE POLICLINICO - PALAZZO UFFICI - 2° piano  VIA FRANCESCO SFORZA, 28 20122 MILANO (MI) |
| **Center 17 (1017) 114934/7**  Prof. Luca BIANCHI  U.O.C. Dermatologia Dip. Medicina Università degli Studi Tor Vergata Fondazione Policlinico Tor Vergata VIALE OXFORD, 81  00133 ROMA (RM) | **Ethics Committee**  COMITATO ETICO INDIPENDENTE presso la FONDAZIONE PTV POLICLINICO TOR VERGATA DI ROMA  VIALE OXFORD, 81  00133 ROMA (RM) |
| **Center 18 (1018) 143733/2**  Dr. Paolo DAPAVO  S.C. Dermatologia U Università di Torino  Presidio Ospedaliero Dermatologico San Lazzaro  A.O. Città della Salute e della Scienza di Torino VIA CHERASCO, 23  10126 TORINO (TO) | **Ethics Committee**  COMITATO ETICO INTERAZIENDALE A.O. CITTA' DELLA SALUTE E DELLA SCIENZA DI TORINO  CORSO BRAMANTE, 88/90 10126 TORINO (TO) |
| **Center 19 (1019) 130615/8**  Prof. Sergio DI NUZZO  S.C. Dermatologia Dipartimento di Medicina Clinica e Sperimentale Università degli Studi di Parma  Az. Ospedaliero Universitaria di Parma Via Gramsci, 14  43121 PARMA (PR) | **Ethics Committee**  COMITATO ETICO PER PARMA c/o Azienda Ospedaliero-Universitaria di Parma  VIA GRAMSCI, 11/14 43100 PARMA (PR) |
| **Center 20 (1020) 134706/5**  Prof. Fabio AYALA  U.O.C. di Dermatologia Clinica Dipartimento di Medicina Clinica e Chirurgia Università degli Studi Federico II  Azienda Ospedaliera Universitaria Federico II VIA SERGIO PANSINI, 5  80131 NAPOLI (NA) | **Ethics Committee**  COMITATO ETICO UNIVERSITA' FEDERICO II DI NAPOLI VIA SERGIO PANSINI, 5  80131 NAPOLI (NA) |

|  | |
| --- | --- |
| **Center 21 (1021) 135639/2**  Prof. Giuseppe MICALI  U.O. Dermatologia Università degli Studi  Presidio Ospedaliero Gaspare Rodolico  AZ. OSP. UNIV. POLICLINICO-VITTORIO EMANUELE VIA SANTA SOFIA, 78  95123 CATANIA (CT) | **Ethics Committee**  COMITATO ETICO CATANIA 1 - c/o A.O.U. POLICLINICO-VITTORIO EMANUELE DI CATANIA  VIA SANTA SOFIA, 78 95123 CATANIA (CT) |
| **Center 22 (1022) 116123/16**  Prof. Giovanni PELLACANI  S.C. Dermatologia Dip. Medicina e Specialità Mediche Università degli Studi di Modena e Reggio Emilia  Az. Osp. Universitaria Policlinico di Modena Via del Pozzo, 71  41100 MODENA (MO) | **Ethics Committee**  COMITATO ETICO DELLA PROVINCIA DI MODENA C/O AZIENDA POLICLINICO, VIA DEL POZZO 71 41124 MODENA (MO) |
| **Center 23 (1023) 116950/30**  Prof.ssa Ketty PERIS Istituto di Dermatologia  Università Cattolica del Sacro Cuore Fondazione Policlinico Universitario A. Gemelli LARGO AGOSTINO GEMELLI, 8  00168 ROMA (RM) | **Ethics Committee**  COMITATO ETICO DELL'UNIVERSITA' CATTOLICA DEL S. CUORE - FONDAZIONE POLICLINICO GEMELLI  LARGO AGOSTINO GEMELLI, 8 00168 ROMA (RM) |
| **Center 24 (1024) 133930/3**  Dr.ssa Annalisa PATRIZI  U.O.C. di Dermatologia Dipartimento Testa Collo ed Organi di Senso Università degli Studi  Az. Osp. Univ. di Bologna Policl. S.Orsola - Malpighi VIA PIETRO ALBERTONI  40138 BOLOGNA (BO) | **Ethics Committee**  COMITATO ETICO INDIPENDENTE DELL'AZIENDA OSPEDALIERO- UNIVERSITARIA POLICLINICO S.ORSOLA - MALPIGHI DI BOLOGNA  Via Albertoni Pietro, 15 - Padiglione 3 40138 BOLOGNA (BO) |
| **Center 25 (1025) 139174/5**  Dr.ssa Giovanna MALARA  U.O.C. di Dermatologia  Presidio Ospedaliero Papardo-Piemonte  A.O.R. Papardo-Piemonte  VIA PAPARDO MARINA, Contrada Papardo 98100 MESSINA (ME) | **Ethics Committee**  COMITATO ETICO INTERAZIENDALE DELLA PROVINCIA DI MESSINA C/O AOU POLICLINICO G. MARTINO  VIA CONSOLARE VALERIA, 24 98124 MESSINA (ME) |
| **Center 26 (1026) 138331/3** | **Ethics Committee** |

|  | |
| --- | --- |
| Prof. Giusto TREVISAN  U.O.C. Dermatologia e Venereologia Ospedale Maggiore  Az. Sanitaria Universitaria Integrata di Trieste PIAZZA DELL' OSPITALE, 1  34125 TRIESTE (TS) | Comitato Etico Unico Regionale (CEUR) c/o Direzione Scientifica del Centro di riferimento Oncologico di Aviano  Via Gallini 2  33081 AVIANO (PN) |
| **Center 27 (1027) 137933/6**  Dr. Gianluca PAGNANELLI  Centro Ricerca Integrato Psoriasi Laboratorio di Immunologia Sperimentale Istituto Dermopatico dell'Immacolata IRCCS  VIA DEI MONTI DI CRETA, 104 00167 ROMA (RM) | **Ethics Committee**  COMITATO ETICO DELL`IRCCS ISTITUTO DERMOPATICO DELL`IMMACOLATA DI ROMA  VIA DEI MONTI DI CRETA, 104 00167 ROMA (RM) |
| **Center 28 (1028) 137934/2**  Prof.ssa Concetta POTENZA  U.O.C. Dermatologia Universitaria - Polo Pontino Università La Sapienza Presidio Ospedaliero di Terracina Alfredo Fiorini - P.O. Centro  AUSL LATINA  Via Firenze, 2  04019 TERRACINA (LT) | **Ethics Committee**  COMITATO ETICO LAZIO 2 presso ASL ROMA 2 VIA PRIMO CARNERA, 1  00142 ROMA (RM) |
| **Center 29 (1029) 132446/4**  Prof. Marco ROMANELLI  U.O. Dermatologia  Presidio Ospedaliero S. Chiara  Az. Ospedaliero Universitaria Pisana VIA ROMA, 35/67  56126 PISA (PI) | **Ethics Committee**  COMITATO REGIONE TOSCANA - AREA VASTA NORD OVEST c/o AZIENDA OSPEDALIERO UNIVERSITARIA PISANA DI PISA  VIA ROMA, 67  56126 PISA (PI) |
| **Center 30 (1030) 117065/5**  Dr. Piergiorgio MALAGOLI  Ambulatorio Psocare per la Terapia della Psoriasi IRCCS Policlinico San Donato  Piazza Edmondo Malan  20097 SAN DONATO MILANESE (MI) | **Ethics Committee**  COMITATO ETICO DELL'IRCCS OSPEDALE SAN RAFFAELE DI MILANO VIA OLGETTINA, 60  20132 MILANO (MI) |
| **Center 31 (1031) 141407/17**  Dr. Alberto RESEGHETTI  U.O. di Dermatologia  Presidio Ospedaliero Papa Giovanni XXIII ASST Papa Giovanni XXIII | **Ethics Committee**  COMITATO ETICO DI BERGAMO c/o A.S.S.T. Papa Giovanni XXIII PIAZZA OMS, 1  24127 BERGAMO (BG) |

|  | |
| --- | --- |
| PIAZZA OMS, 1  24100 BERGAMO (BG) |  |
| **Center 32 (1032) 112633/43**  Prof.ssa Aurora PARODI  Clinica Dermatologica pad. 29 Dermatologia Sociale Ospedale Policlinico San Martino IRCCS  LARGO ROSANNA BENZI, 10 16132 GENOVA (GE) | **Ethics Committee**  COMITATO ETICO REGIONALE DELLA LIGURIA c/o IRCCS AOU SAN MARTINO - IST ISTITUTO NAZIONALE PER LA RICERCA SUL CANCRO LARGO ROSANNA BENZI, 10  16132 GENOVA (GE) |
| **Center 33 (1033) 117067/29**  Dr. Francesco LOCONSOLE  U.O. di Dermatologia Centro Psoriasi Università degli Studi  Az.Osp.Univ. Consorziale Policlinico di Bari PIAZZALE GIULIO CESARE, 11  70124 BARI (BA) | **Ethics Committee**  COMITATO ETICO DELL'AOU CONSORZIALE POLICLINICO DI BARI PIAZZALE GIULIO CESARE, 11  70124 BARI (BA) |
| **Center 34 (1034) 116975/17**  Prof.ssa Anna Maria OFFIDANI  S.O.D. Clinica di Dermatologia Università degli Studi  A.O.U.Osp. Riuniti Umberto I-GM Lancisi-G. Salesi VIA CONCA, 71 - Località TORRETTE  60126 ANCONA (AN) | **Ethics Committee**  COMITATO ETICO REGIONALE (CER) DELLE MARCHE c/o AZIENDA OSPEDALIERA UNIVERSITARIA OSPEDALI RIUNITI UMBERTO I-LANCISI- GM SALESI DI ANCONA  VIA CONCA  60126 ANCONA (AN) |
| **Center 35 (1035) 118673/10**  Dr. Giuseppe ALBERTINI  S.C. di Dermatologia  Presidio Ospedaliero Arcispedale S. Maria Nuova AUSL DI REGGIO EMILIA - IRCCS  Viale Risorgimento, 80 42123 REGGIO EMILIA (RE) | **Ethics Committee**  COMITATO ETICO PROVINCIALE DI REGGIO EMILIA c/o Azienda  Ospedaliera Arcispedale S. Maria Nuova/IRCCS - I-RS Edificio Spallanzani Viale Umberto I, 50  42123 REGGIO EMILIA (RE) |
| **Center 36 (1036) 117184/27**  Prof. Santo Raffaele MERCURI  U.O.S. Dermatologia  Ospedale San Raffaele IRCCS S.r.l. VIA OLGETTINA, 60  20132 MILANO (MI) | **Ethics Committee**  COMITATO ETICO DELL'IRCCS OSPEDALE SAN RAFFAELE DI MILANO VIA OLGETTINA, 60  20132 MILANO (MI) |
| **Center 37 (1037) 117183/16** | **Ethics Committee** |

|  | |
| --- | --- |
| Prof. Ugo BOTTONI  U.O. di Dermatologia  Università degli Studi Magna Graecia di Catanzaro  A.O.U. Policlinico Mater Domini Viale Europa - Località Germaneto 88100 CATANZARO (CZ) | COMITATO ETICO REGIONE CALABRIA SEZIONE AREA CENTRO c/o  A.O.U. MATER DOMINI DI CATANZARO  Via T. Campanella 115 88100 CATANZARO (CZ) |
| **Center 38 (1038) 138910/2**  Dr. Marco SIMONACCI  U.O.C. Dermatologia  Presidio Ospedaliero di Macerata - Area Vasta n. 3 Macerata ASUR Marche - Az. San. Unica Reg.  VIA SANTA LUCIA, 2 62100 MACERATA (MC) | **Ethics Committee**  COMITATO ETICO REGIONALE (CER) DELLE MARCHE c/o AZIENDA OSPEDALIERA UNIVERSITARIA OSPEDALI RIUNITI UMBERTO I-LANCISI- GM SALESI DI ANCONA  VIA CONCA  60126 ANCONA (AN) |
| **Center 39 (1039)**  Dr. Antonio ZINI  Struttura Semplice Dipartimentale Dermatologia del Dipartimento di Neuroscienze Presidio Ospedaliero di Mantova  ASST di Mantova Via Lago Paiolo  46100 MANTOVA (MN) | **Ethics Committee**  COMITATO ETICO VALPADANA c/o AO di Cremona VIALE CONCORDIA, 1  26100 CREMONA (CR) |
| **Center 40 (1040) 102938/8**  Dr. Maurizio CONGEDO  U.O. Dermatologia  Presidio Ospedaliero Vito Fazzi ASL Lecce  Piazza Filippo Muratore 73100 LECCE (LE) | **Ethics Committee**  COMITATO ETICO AREA 3 AUSL LECCE  Via Miglietta 5  73100 LECCE (LE) |
| **Center 41 (1041)**  Prof. Stefano CALVIERI  U.O.C. Clinica Dermatologica Università La Sapienza  A.O. Policlinico Umberto I° VIALE DEL POLICLINICO, 155 00161 ROMA (RM) | **Ethics Committee**  COMITATO ETICO DELL'UNIVERSITA' SAPIENZA VIALE DEL POLICLINICO, 155  00161 ROMA (RM) |
| **Center 42 (1042) 118064/5 Closed**  Dr. Angelo PICCIRILLO  U.O. di Dermatologia | **Ethics Committee**  COMITATO ETICO UNICO REGIONALE PER LA BASILICATA C/O  Segreteria Tecnico Scientifica del CEUR presso U.O.C. Medicina Legale |

|  | |
| --- | --- |
| Presidio Ospedale San Carlo  Azienda Ospedaliera Regionale San Carlo Via Potito Petrone  85100 POTENZA (PZ) | Azienda Ospedaliera Regionale San Carlo VIA POTITO PETRONE, 1  85100 POTENZA (PZ) |
| **Center 43 (1043) 100716/6 Closed**  Dr. Angelo CARABELLI  U.O. di Dermatologia  Presidio Ospedaliero S. Antonio Abate di Gallarate ASST della Valle Olona  Via Pastori, 4  21013 GALLARATE (VA) | **Ethics Committee**  COMITATO ETICO DELL'INSUBRIA c/o OSPEDALE DI CIRCOLO E FONDAZIONE MACCHI  VIALE LUIGI BORRI 57 21100 VARESE (VA) |
| **Center 44 (1044) Closed**  Dr. Giorgio FILOSA  U.O.C. Dermatologia  Presidio Ospedaliero Carlo Urbani  A.S.U.R. Marche - Area Vasta 2 Via Dei Colli, 52  60035 JESI (AN) | **Ethics Committee**  COMITATO ETICO REGIONALE (CER) DELLE MARCHE c/o AZIENDA OSPEDALIERA UNIVERSITARIA OSPEDALI RIUNITI UMBERTO I-LANCISI- GM SALESI DI ANCONA  VIA CONCA  60126 ANCONA (AN) |
| **Center 45 (1045) 117407/6**  Dr. Riccardo SIRNA  U.O.C. Dermatologia  Presidio Ospedaliero della Misericordia AZIENDA USL TOSCANA SUD EST  Via Senese, 161/171 58100 GROSSETO (GR) | **Ethics Committee**  COMITATO ETICO REGIONE TOSCANA - AREA VASTA SUD EST presso AZIENDA OSPEDALIERA UNIVERSITARIA SENESE DI SIENA  c/o UOC Farmacia AOUS - Viale Bracci 53100 SIENA (SI) |
| **Center 46 (1046) 138882/2 Closed**  Dr. Stefano DONELLI Dermatologia  Presidio Ospedaliero di Piacenza Ospedale "Guglielmo da Saliceto" AUSL Piacenza  Via Taverna, 46  29100 PIACENZA (PC) | **Ethics Committee**  COMITATO ETICO DELLA AUSL DI PIACENZA VIA TAVERNA 49  29100 PIACENZA (PC) |
| **Center 47 (1047)**  Dr. Claudio BONIFATI  S.C. Dermatologia Clinica  ISG Istituto Dermatologico San Gallicano IRCCS IFO Istituti Fisioterapici Ospitalieri | **Ethics Committee**  COMITATO ETICO CENTRALE IRCCS LAZIO - Sezione IFO-BIETTI c/o IRCCS ISTITUTI FISIOTERAPICI OSPITALIERI DI ROMA  VIA ELIO CHIANESI, 53 00144 ROMA (RM) |

|  | |
| --- | --- |
| VIA ELIO CHIANESI, 53 00144 ROMA (RM) |  |
| **Center 48 (1048) 124803/11**  Prof. Luca STINGENI  Dermatologia Clinica Allergologica e Venereologica  Ospedale Santa Maria della Misericordia - Loc. S. Andrea delle Fratte Azienda Ospedaliera di Perugia  PIAZZALE GIORGIO MENGHINI, 1 06132 PERUGIA (PG) | **Ethics Committee**  COMITATO ETICO DELLE AZIENDE SANITARIE DELL'UMBRIA - SEGRETERIA SCIENTIFICO-AMMINISTRATIVA DEL CEAS UMBRIA  Via della Rivoluzione, 16 - ELLERA DI CORCIANO 06073 CORCIANO (PG) |
| **Center 49 (1049)**  Prof. Nicola PIMPINELLI  S.C. Dermatologia Dipartimento di Chirurgia e Medicina Traslazionale DCMT Ospedale Piero Palagi - I.O.T.  AZIENDA SANITARIA DI FIRENZE  VIA MICHELANGIOLO BUONARROTI, 41 50125 FIRENZE (FI) | **Ethics Committee**  COMITATO ETICO REGIONE TOSCANA - AREA VASTA CENTRO c/o AZIENDA OSPEDALIERO-UNIVERSITARIA CAREGGI DI FIRENZE LARGO GIOVANNI ALESSANDRO BRAMBILLA, 3  50134 FIRENZE (FI) |
| **Center 50 (1050) 116976/8**  Prof.ssa Manuela PAPINI  Sezione di Clinica Dermatologica di Terni Dip. delle Specialità Medico Chirurgiche Università degli Studi di Perugia  Azienda Ospedaliera S. Maria di Terni Via Tristano di Joannuccio  05100 TERNI (TR) | **Ethics Committee**  COMITATO ETICO DELLE AZIENDE SANITARIE DELL'UMBRIA - SEGRETERIA SCIENTIFICO-AMMINISTRATIVA DEL CEAS UMBRIA  Via della Rivoluzione, 16 - ELLERA DI CORCIANO 06073 CORCIANO (PG) |
| **Center 51 (1051) Closed**  Dr. Giovanni CRUCIANI  U.O.C. di Dermatologia  Azienda Ospedaliera San Camillo Forlanini CIRCONVALLAZIONE GIANICOLENSE, 87  00152 ROMA (RM) | **Ethics Committee**  COMITATO ETICO LAZIO 1 presso AZIENDA OSPEDALIERA SAN CAMILLO  - C. FORLANINI DI ROMA CIRCONVALLAZIONE GIANICOLENSE, 87  00152 ROMA (RM) |
